# Supplementary material for: Cell-based high-throughput compound screening reveals functional interaction between oncofetal HMGA2 and topoisomerase I
Source: PubMed Central journal article supplement — Nucleic Acids Res. 2016 Sep 1;44(22):e162. doi: 10.1093/nar/gkw759 (PMC5159536; doi:10.1093/nar/gkw759), 2016-09-01
Supplement: supp_gkw759_nar-01456-met-g-2016-File006.pdf [file supp_gkw759_nar-01456-met-g-2016-File006.pdf]

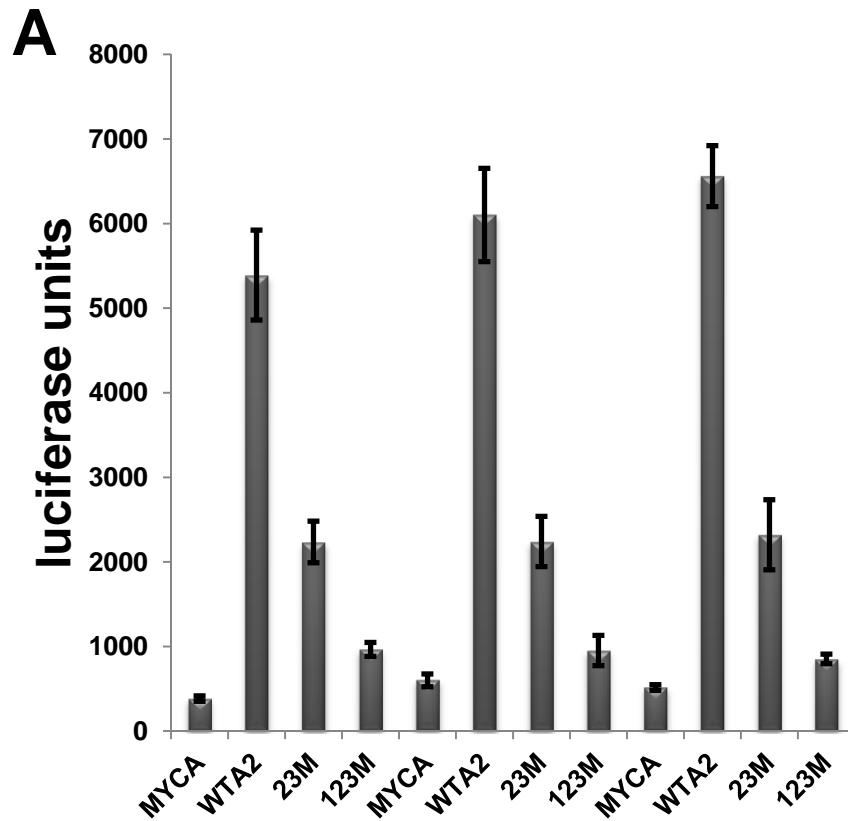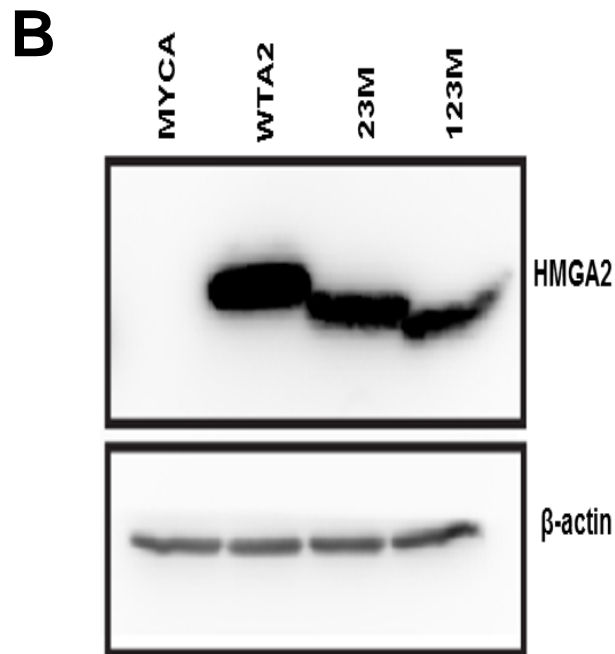

**Suppl. Fig. 1. Robustness of the reporter system.** (A) Luciferase reporter assays of three independent sets of four co-transfections each. We show mean values plus standard deviations of readings from eight replicates per co-transfected plasmids. (B) Western blot of expression levels of wild-type and mutant HMGA2 proteins using anti-HMGA2 antibodies and  $\beta$ -actin as loading control.
