# Supplementary material for: Cell-based high-throughput compound screening reveals functional interaction between oncofetal HMGA2 and topoisomerase I
Source: PubMed Central journal article supplement — Nucleic Acids Res. 2016 Sep 1;44(22):e162. doi: 10.1093/nar/gkw759 (PMC5159536; doi:10.1093/nar/gkw759), 2016-09-01
Supplement: supp_gkw759_nar-01456-met-g-2016-File007.pdf [file supp_gkw759_nar-01456-met-g-2016-File007.pdf]

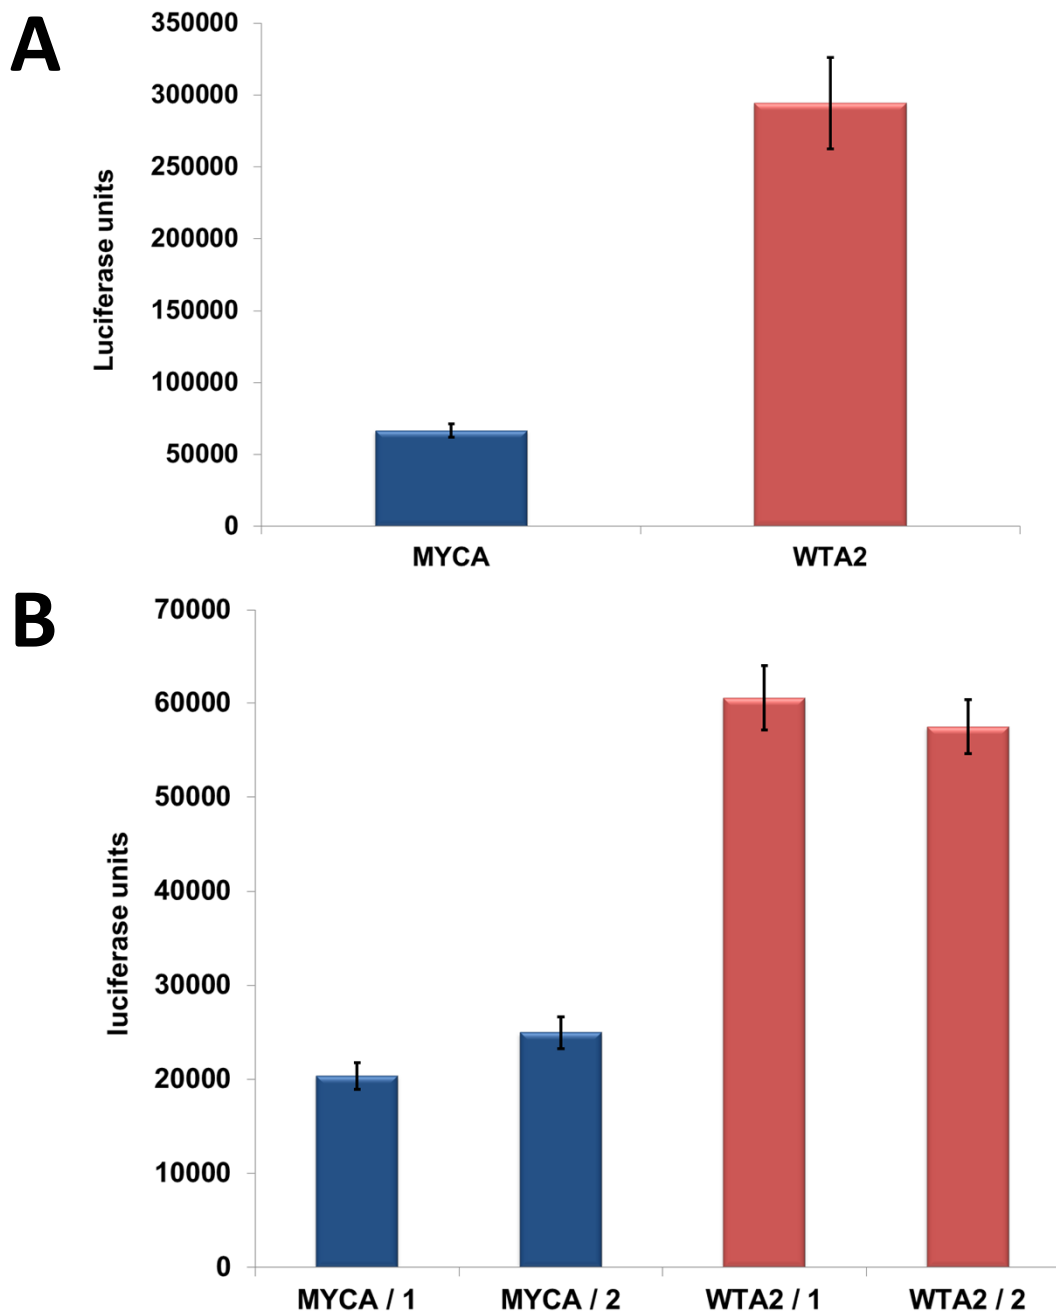

**Suppl. Fig. 2. The reporter system functions in different cell lines. (A)** HEK 293T cells: Co-transfections of reporter with either mock (MYCA) or HMGA2 (WTA2) expression vectors were each performed in 2 wells of a 6 well plate. Cells from the two independent transfections were combined for MYCA and WTA2 24 hours later and plated in 12 wells of a 96 well plate. We show mean values plus standard deviation of luciferase activities obtained from 12 wells 24 hours after plating. **(B)** H1299 cells: as in **(A)**, co-transfections of reporter with either mock (MYCA) or HMGA2 (WTA2) expression vectors were performed in 2 wells of a 6 wells plate. In this case, cells from each six well were plated in 6 wells of a 96 well plate 24 hours later. We show mean values plus standard deviation of luciferase activities obtained from 6 wells for each transfection 24 hours after plating.
