# Supplementary material for: Cell-based high-throughput compound screening reveals functional interaction between oncofetal HMGA2 and topoisomerase I
Source: PubMed Central journal article supplement — Nucleic Acids Res. 2016 Sep 1;44(22):e162. doi: 10.1093/nar/gkw759 (PMC5159536; doi:10.1093/nar/gkw759), 2016-09-01
Supplement: supp_gkw759_nar-01456-met-g-2016-File008.pdf [file supp_gkw759_nar-01456-met-g-2016-File008.pdf]

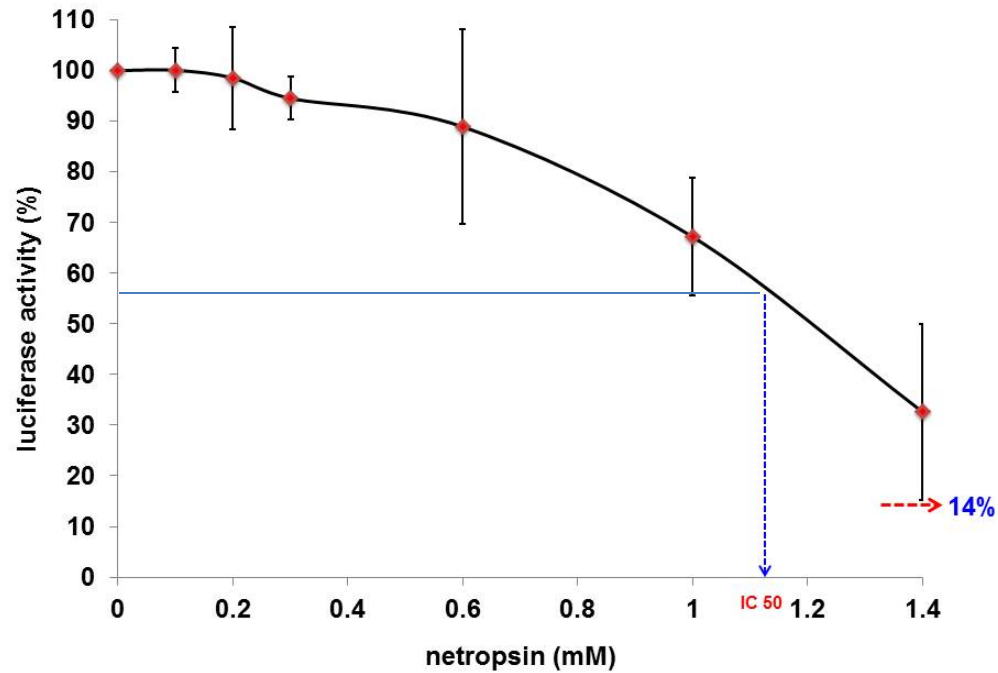

**Suppl. Fig. 3. Determination of IC<sub>50</sub> for netropsin.** Luciferase activity values were obtained from three independent co-transfections of HMGA2 with reporter plasmids in HeLa cells. Cells from each co-transfection were plated out in 96-wells in three or four replicates, and each set of replicates were treated with netropsin, as indicated, or without the drug as control. For each transfection, mean luciferase values were obtained from replicates and normalized to the control without drug, set as 100%. The normalized values from the three independent transfections were combined and mean values plus standard deviations determined, and plotted against the corresponding drug concentration. The dashed arrow points to the normalized level of reporter activity in the presence of mock (MYCA) at 1.4 mM netropsin (14%).
