# Supplementary material for: Cell-based high-throughput compound screening reveals functional interaction between oncofetal HMGA2 and topoisomerase I
Source: PubMed Central journal article supplement — Nucleic Acids Res. 2016 Sep 1;44(22):e162. doi: 10.1093/nar/gkw759 (PMC5159536; doi:10.1093/nar/gkw759), 2016-09-01
Supplement: supp_gkw759_nar-01456-met-g-2016-File009.pdf [file supp_gkw759_nar-01456-met-g-2016-File009.pdf]

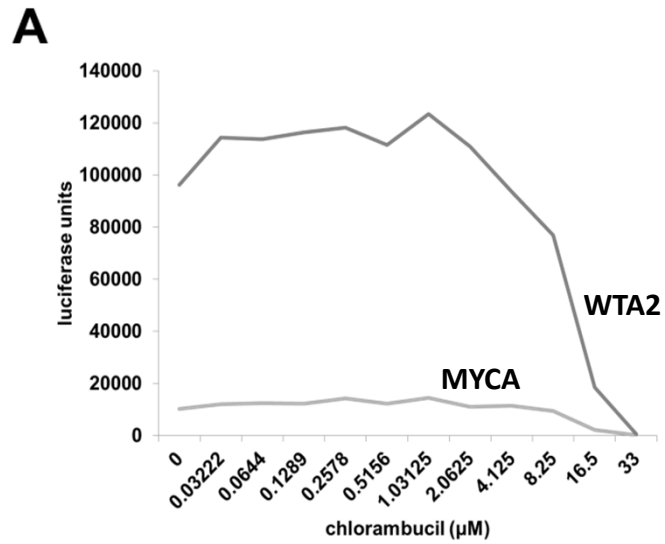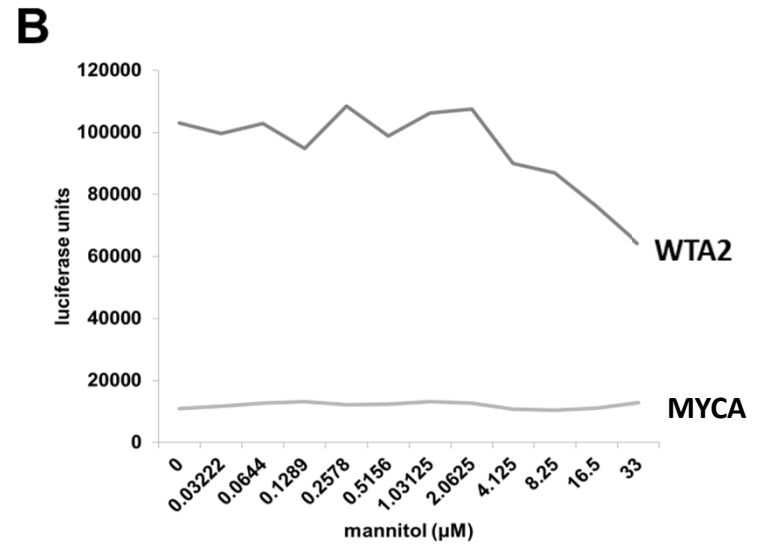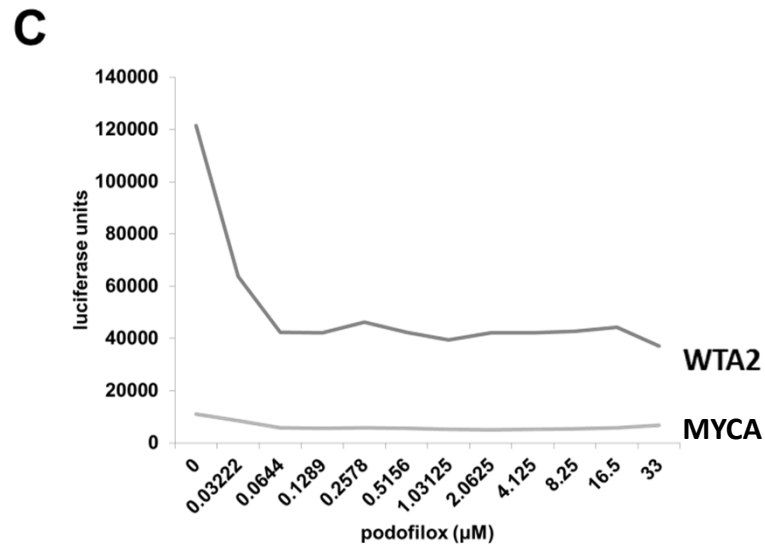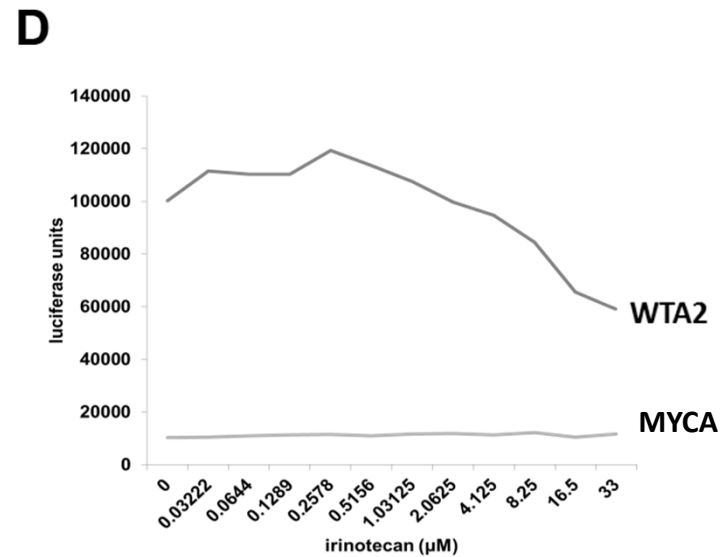

**Suppl. Fig. 4. Luciferase reporter assays of four candidate HMGA2 antagonists in 96 well-formats.**

Co-transfected HeLa cells were seeded and incubated for 24 hrs with serially diluted drugs, as indicated.

One representative experiment each. Note that the drugs similarly affected mock (MYCA) and HMGA2-mediated (WTA2) reporter expression in panels A,B and C.
