# Supplementary material for: Cell-based high-throughput compound screening reveals functional interaction between oncofetal HMGA2 and topoisomerase I
Source: PubMed Central journal article supplement — Nucleic Acids Res. 2016 Sep 1;44(22):e162. doi: 10.1093/nar/gkw759 (PMC5159536; doi:10.1093/nar/gkw759), 2016-09-01
Supplement: supp_gkw759_nar-01456-met-g-2016-File010.pdf [file supp_gkw759_nar-01456-met-g-2016-File010.pdf]

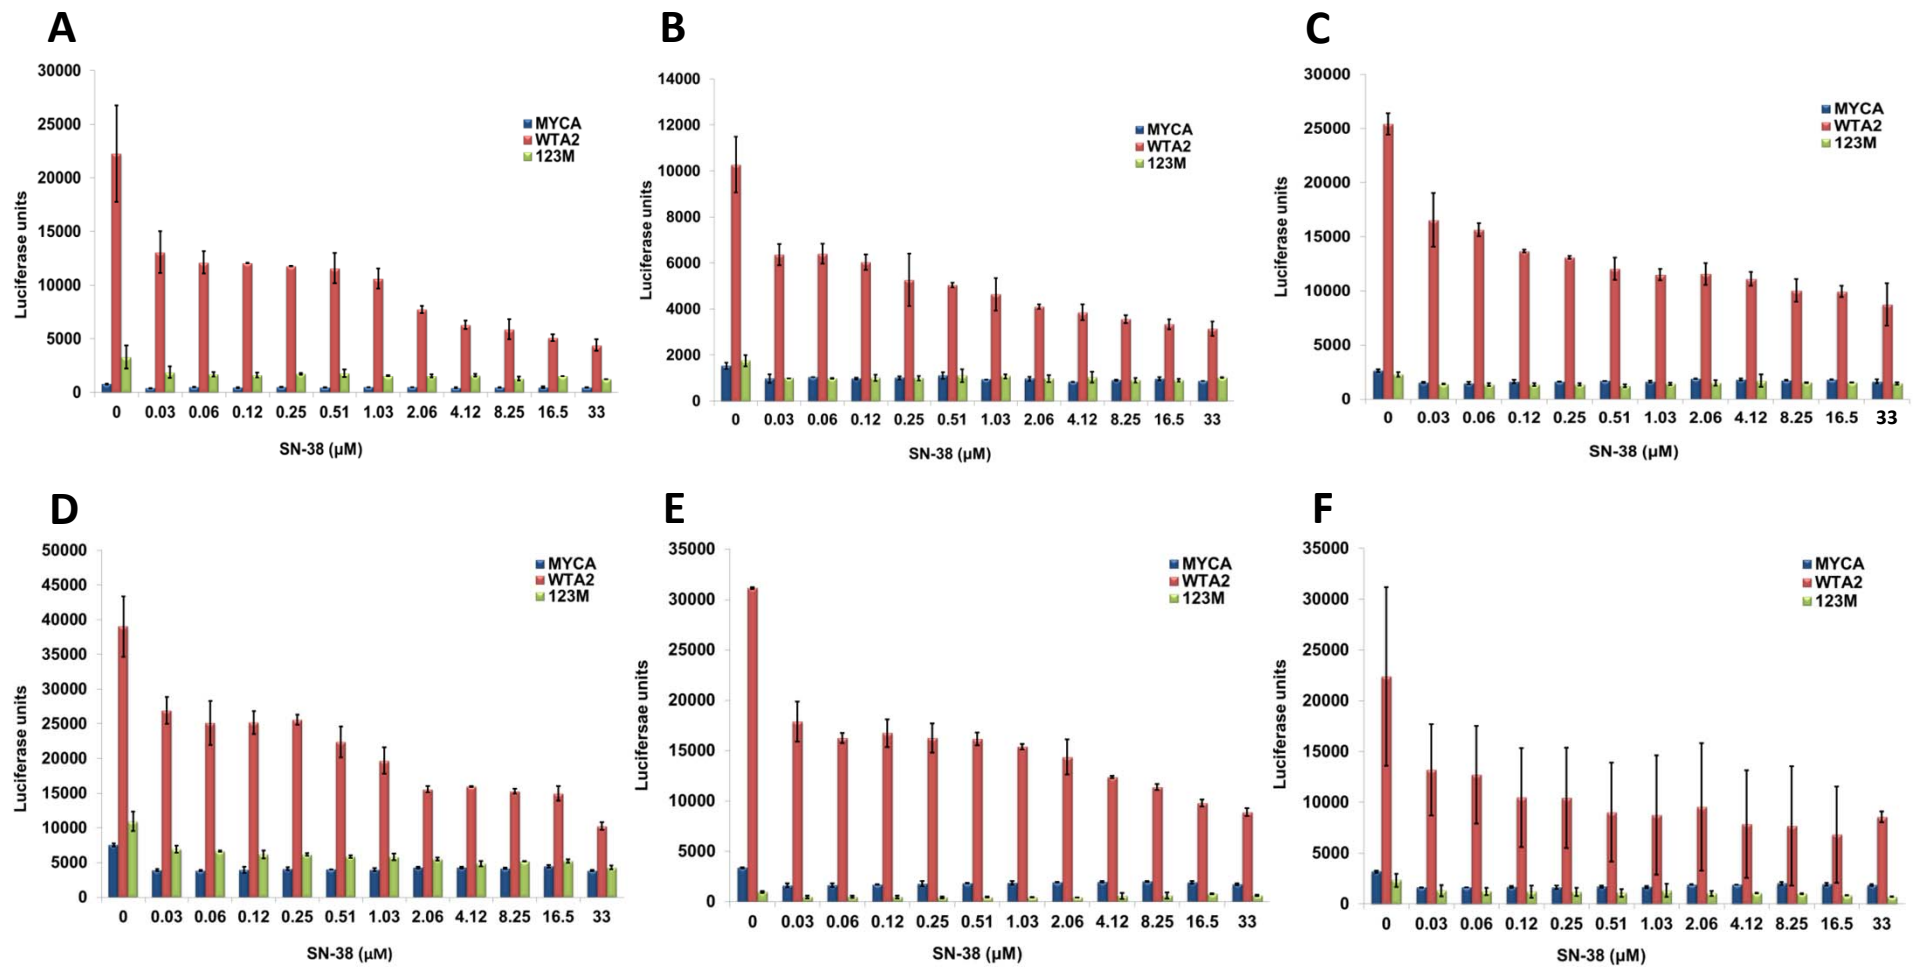

**Suppl. Fig. 5. Inhibition of HMGA2 by SN-38 in six independent co-transfections in HeLa cells.** In each case, cells were exposed to increasing concentrations of SN-38 for 24 hours, and data from two replicates per co-transfected pair of vectors were collected.
